## Two Competing Guilds as a Core Microbiome Signature for Chronic Diseases

Guojun Wu<sup>2,3\*</sup>, Ting Xu<sup>1\*</sup>, Naisi Zhao<sup>6\*</sup>, Yan Y. Lam<sup>7\*</sup>, Xiaoying Ding<sup>5\*</sup>, Dongqin Wei<sup>4</sup>, Jian Fan<sup>4</sup>, Yajuan Shi<sup>4</sup>, Xiaofeng Li<sup>4</sup>, Mi Li<sup>4</sup>, Shenjie Ji<sup>4</sup>, Xuejiao Wang<sup>5</sup>, Huaqing Fu<sup>1</sup>, Feng Zhang<sup>8</sup>, Yongde Peng<sup>5†</sup>, Yu Shi<sup>4†</sup>, Chenhong Zhang<sup>1†</sup>, Liping Zhao<sup>1,2,3†</sup>

<sup>1</sup>State Key Laboratory of Microbial Metabolism and Ministry of Education Key Laboratory of Systems Biomedicine, School of Life Sciences and Biotechnology, Shanghai Jiao Tong University, Shanghai 200240, China

<sup>2</sup>Department of Biochemistry and Microbiology, School of Environmental and Biological Sciences and Center for Microbiome, Nutrition, and Health, New Jersey Institute for Food, Nutrition, and Health, Rutgers, The State University of New Jersey, New Brunswick, NJ 08901, USA

<sup>3</sup>Rutgers-Jiaotong Joint Laboratory for Microbiome and Human Health, New Brunswick, NJ, USA

<sup>4</sup>Department of Endocrinology and Metabolism, Qidong People's Hospital, Jiangsu 226200, China

<sup>5</sup>Department of Endocrinology and Metabolism, Shanghai General Hospital, Shanghai Jiao Tong University School of Medicine, Shanghai 200080, China

<sup>6</sup>Department of Public Health and Community Medicine, School of Medicine, Tufts University, Boston, MA, 02111, USA

<sup>7</sup>Gut Microbiota and Metabolism Group, Centre for Chinese Herbal Medicine Drug Development, School of Chinese Medicine, Hong Kong Baptist University, Units 201-207, Building 15W, 15 Science Park West Avenue, Pak Shek Kok, N.T., Hong Kong, China

<sup>8</sup>Nutrition Department (Clinical Study Center of Functional Food), The Affiliated Hospital of Jiangnan University Wuxi, Jiangsu 214122, China

\*co-first author

†co-corresponding author

22  
23  
24  
25  
26  
27  
28  
29  
30  
31  
32  
33

## 34 **Summary Paragraph**

35  
36 Gut microbiota may work as an essential organ and its members interact closely with each other  
37 and form a higher-level organization called guilds. How such guild-level structure supports the gut  
38 microbiota to stably provide essential health-relevant functions to the host remains elusive. With  
39 high quality metagenome-assembled genomes as network nodes, here we identified a core  
40 microbiome signature made up of two robust competing guilds that together correlate with a wide  
41 range of host health conditions. Genomes in these two guilds kept their ecological relationship  
42 unchanged despite experiencing profound abundance changes during a 3-month high fiber  
43 intervention and 1-year follow-up in patients with type 2 diabetes. The genomes of one guild  
44 harbored more genes for plant polysaccharide degradation and butyrate production, while the other  
45 guild had more genes for virulence or antibiotic resistance. A Random Forest regression model  
46 showed that the abundance distributions of these genomes were associated with 41 out of 43 bio-  
47 clinical parameters in the study cohort. With these genomes as reference, Random Forest modeling  
48 successfully classified case and control of 8 chronic diseases in 12 independent metagenomic  
49 datasets from 1,816 participants across ethnicity and geography. This core microbiome signature  
50 may facilitate ecological management of chronic diseases.

51

## 52 **Introduction**

53 Over eons of co-evolution, humans have developed a robust symbiotic relationship with  
54 their gut microbiome<sup>1,2</sup>. The gut microbiome supports the host's homeostasis in metabolism,  
55 immunity, development, and behavior, etc.<sup>3</sup> It has been regarded as an essential organ because  
56 the attenuation or loss of such health-relevant functions of a dysbiotic gut microbiome has been  
57 linked with the initiation and/or progression of many chronic diseases, including type 2 diabetes

58 (T2DM)<sup>4-6</sup>. However, the underlying gut microbiome structural signatures that support the stable  
59 provision of health-relevant functions to the host remain to be identified.

60 The gut microbiota is a complex adaptive system<sup>7</sup>, in which the minimum responding units  
61 to environmental perturbations are bacterial genomes<sup>8</sup>. More importantly, genomes are not  
62 independent microbiome features. They form ecological interactions, such as competition or  
63 cooperation, with each other and organize themselves into a higher-level structure called  
64 “guilds”<sup>9</sup>. Each guild is a potential functional group of bacteria in the gut ecosystem. Guild  
65 members may have widely diverse taxonomic backgrounds but thrive or decline together and  
66 thus show co-abundant behavior. Guild-level variations have been positively or negatively  
67 correlated with disease phenotypes and their members have been demonstrated as having causal  
68 role in host disease phenotypes<sup>10,11</sup>. Although a suite of microbiome-wide association studies  
69 (MWAS) has attempted to identify the microbiome signatures (using features such as genes,  
70 pathways, taxa, etc.) that are associated with disease phenotypes<sup>12-15</sup>, genomes and their guild-  
71 level organization have not been extensively employed to describe the ecological structure that  
72 supports the stable provision of health-relevant functions to the host.

73 To this end, we suggest a genome-centric approach which is based on high-quality draft  
74 genomes assembled directly from metagenomic datasets (high-quality metagenome-assembled  
75 genomes, HQMAGs). This approach uses genomes as nodes of ecological networks and their  
76 guild-level aggregations as ecologically meaningful features for identifying microbiome  
77 signatures of chronic diseases. Furthermore, this approach is completely data-driven and  
78 unsupervised, requiring no reference databases or prior knowledge.

79 In this study, we hypothesized that bacteria required for providing essential health-relevant  
80 functions to the host<sup>2</sup> should maintain stable ecological interactions with each other to form

81 robust guilds<sup>16,17</sup>. To identify microbiome signatures that are based on stable interactions among  
82 HQMAGs, we randomized T2DM patients at baseline (M0) to receive either 3-month (M3) of  
83 high fiber intervention (W group; n = 74) or standard care (U group; n= 36) followed by a one-  
84 year follow-up (M15) in an open label, controlled trial (Fig. 1A and Fig. S1). The high fiber  
85 intervention was used to exert a positive environmental perturbation to dramatically and  
86 reversibly change the abundance of members of the gut microbiome<sup>10,11</sup>. Co-abundance network  
87 analysis at each of the three time points enabled us to identify genome pairs that can keep their  
88 correlations unchanged despite significant community-wide abundance changes caused by the  
89 perturbations. We found that these robust genome pairs were from 141 HQMAGs and these  
90 genomes formed two competing guilds. These two guilds were organized as the two competing  
91 ends of a robust seesaw-like network, whenever one guild increased, the other decreased in  
92 abundance. Together, these seesaw networked genomes supported machine learning models for  
93 predicting the response of a wide range of metabolic phenotypes to dietary intervention in the  
94 T2DM cohort, as well as for classifications of case and control of 12 independent metagenomic  
95 datasets from 1,816 subjects across different cohorts and various chronic diseases including  
96 T2DM, atherosclerotic cardiovascular disease (ACVD), liver cirrhosis (LC), inflammatory bowel  
97 diseases (IBD), colorectal cancer (CRC), ankylosing spondylitis (AS), schizophrenia, and  
98 Parkinson's disease (PD), suggesting that we may have identified a core microbiome signature  
99 across different chronic diseases.

100

## 101 **Results**

### 102 **Reversible changes in the gut microbiota associate with reversible changes of host** 103 **metabolic phenotypes**

104 Dietary fiber intake in the U group remained unchanged throughout the study, whereas W  
105 group had a significant increase in the intake of dietary fibers from M0 to M3 and a decrease  
106 from M3 to M15 (Fig. 1B). Compared with the U group, fiber intake was significantly higher in  
107 the W group at both M3 and M15 (Fig. 1B), but energy and macronutrient consumption were  
108 similar across the study period (Fig. S2).

109 To investigate the gut microbial responses to the introduction and withdrawal of the high  
110 fiber intervention, we performed shotgun metagenomic sequencing on 315 fecal samples  
111 collected from 110 patients of the W and U group, among whom 95 patients provided samples at  
112 all 3 time points and 15 provided samples at M0 and M3 only (Table S2, Fig S1). To achieve  
113 genome-level resolution, we reconstructed 1,845 non-redundant high-quality draft genomes  
114 (HQMAGs, two HQMAGs were collapsed into one if the average nucleotide identity, ANI,  
115 between them was > 99%) from the metagenomic datasets. These HQMAGs accounted for more  
116 than 70% of the total reads. In the context of beta-diversity measured via the Bray-Curtis  
117 distance, the overall structure of the gut microbiota in the W group significantly changed from  
118 M0 to M3 (PERMANOVA test,  $P < 0.001$ ) and returned to that of M0 at M15; there was no  
119 difference in the U group across the 3 timepoints (Fig. 1C, D). Similar changes in alpha-diversity  
120 based on Shannon and Simpson indices were also observed (Fig. S3). These results showed that  
121 high fiber intervention induced significant structural changes of the gut microbiota<sup>11</sup>, however  
122 the gut microbiota reverted to baseline after the intervention was withdrawn indicating a high  
123 resilience in community structure.

124 To determine if host metabolic phenotypes would show similar reversible changes as the  
125 gut microbiota, we examined 43 bio-clinical parameters across the 3 time points. Hemoglobin  
126 A1c (HbA1c) in the U group showed no changes throughout the trial. The high fiber intervention

127 reduced the level of HbA1c in the W group from M0 to M3 by  $15.22\% \pm 9.82\%$  (mean  $\pm$  s.d.),  
128 and such reduction was significantly bigger than what was observed in the U group. At one-year  
129 follow-up of the W group, HbA1c was significantly increased from M3 but remained lower than  
130 at M0 (Fig. 1E). The proportion of patients who achieved adequate glycemic control (HbA1c  $\leq$   
131 7%) was significantly higher in the W group (61.6 % versus 33.3% in the U group) at M3, but  
132 showed no difference between the two groups at M15 (Fig. 1F). The level of fasting blood  
133 glucose and postprandial glucose in meal tolerance test followed a similar trend as HbA1c (Fig.  
134 1G, H). The W group also showed an alleviation of inflammation, hyperlipidemia, obesity, and  
135 T2DM complications from M0 to M3 but these parameters rebounded at one-year follow-up  
136 (Table S3). These results indicate that changes of the host metabolic phenotypes were associated  
137 with the reversible changes of the gut microbiota in response to the introduction or withdraw of  
138 the high fiber intervention.

139

#### 140 **Genome pairs with stable interactions form a seesaw-like network of two competing guilds**

141 To facilitate the identification of genome pairs that keep their ecological interactions stable  
142 during the trial, particularly in the W group with profound microbiota and host phenotypic  
143 changes, we constructed a co-abundance network for each time point based on the abundance  
144 matrix of the HQMAGs representing the prevalent microbes. Co-abundance network is a data-  
145 driven way to investigate ecological interactions between microbes across habitats<sup>18,19</sup>. A total of  
146 477 HQMAGs were selected for network construction because they were detectable in more than  
147 75% of the samples at each time point in the W group. They also accounted for ~60% of the total  
148 abundance of the 1,845 HQMAGs. In the W group, we calculated pairwise correlations of all  
149 113,526 possible genome pairs among these 477 prevalent HQMAGs based on their abundance

150 across the patients at each time point and constructed 3 co-abundance networks ( $\mathbf{G}_{M0}$ ,  $\mathbf{G}_{M3}$  and  
151  $\mathbf{G}_{M15}$ ) (Figure 2A, Table S4). The three networks were of similar order  $S$ , i.e., the total number of  
152 nodes (HQMAGs),  $S_{M0}(442)$ ,  $S_{M3}(421)$ , and  $S_{M15}(429)$ , but they varied considerably in their size  
153  $L$ , i.e., the total number of edges (correlations),  $L_{M0}(4,231)$ ,  $L_{M3}(2,587)$  and  $L_{M15}(4,592)$ .  $L$  in  
154  $\mathbf{G}_{M3}$  decreased to 61.14% of that in  $\mathbf{G}_{M0}$  and rebounded back in  $\mathbf{G}_{M15}$  to 108.53% of that in  $\mathbf{G}_{M0}$ .  
155 This pattern was confirmed by changes in connectance, which is defined as the proportion of  
156 realized ecological interactions among the potential ones (in undirected network, connectance=  
157  $\frac{L}{S(S-1)/2}$ , range:  $[0,1]$ )<sup>20</sup>. Connectance decreased from 0.043 in  $\mathbf{G}_{M0}$  to 0.029 in  $\mathbf{G}_{M3}$  and  
158 rebounded to 0.050 in  $\mathbf{G}_{M15}$ . Changes in  $L$  and connectance showed that high fiber intervention  
159 dramatically reduced the correlations among the prevalent genomes in the network. In addition,  
160 we found that the distributions of degree, i.e. the number of edges a node has, fit well with a  
161 power-law model (Fig. S4, R2 values  $\mathbf{G}_{M0}$ : 0.79,  $\mathbf{G}_{M3}$ : 0.82,  $\mathbf{G}_{M15}$ : 0.79), indicating the presence  
162 of network hubs<sup>21</sup>. If we define hubs as nodes that connect with more than one-fifth of the total  
163 nodes in the network (Fig. S5), we find 24 hubs, 10 of which were in  $\mathbf{G}_{M0}$  and 20 of which in  
164  $\mathbf{G}_{M15}$  but none in  $\mathbf{G}_{M3}$ . These results indicate that the overall structure of the gut microbiome may  
165 have undergone profound changes during the trial, particularly, high fiber intervention resulted in  
166 the loss of interactions between genome pairs.

167 We considered genomes having robust and stable ecological relationship if a genome pair  
168 keeps the same ecological interaction across all three timepoints. Out of the 113,526 possible  
169 genome pairs, 92.39% had no correlations at any of the three time points, suggesting that it may  
170 be a rare event for two genomes to establish an ecological relationship (Fig. 2B). Of the 477  
171 prevalent HQMAGs, 184 had 517 positive correlations and 118 negative correlations at all three  
172 time points. Among these 184 HQMAGs, 43 were excluded from subsequent analysis because

173 they had no interactions with the remaining 141 nodes (Fig. S6). The remaining 141 HQMAGs,  
174 which included 586 genome pairs with stable correlations throughout the trial were further  
175 defined as genomes with stable ecological interactions (GSEIs) and became our microbiome  
176 signature candidates. We then explored how these 141 GSEIs were connected with each other  
177 and with the rest of the nodes in  $G_{M0}$ ,  $G_{M3}$ , and  $G_{M15}$ . (Fig. S7A). The 141 GSEIs had  
178 significantly higher degree, betweenness centrality, eigenvector centrality, closeness centrality  
179 and stress centrality than the rest of the genomes in the networks (Fig. S7B-F). This finding  
180 indicates that these GSEIs exerted a relatively large amount of control over the interaction of  
181 other nodes (reflected by betweenness centrality and eigenvector centrality) and the information  
182 flow in the network (reflected by closeness centrality and stress centrality). Removing these  
183 GSEIs would lead to the collapse of the networks since on average 86.08% of the total edges  
184 would have been lost. These suggest that the 141 GSEIs can be considered as the core nodes of  
185 the networks as they were highly connected not only within themselves but also with other  
186 nodes.

187 These 141 GSEIs were also highly prevalent among participants, as 140 of them were in >  
188 90%, and 104 were in 100% of the 74 individuals in the W group (Fig. S8). In addition, these  
189 141 GSEIs were also mostly predominant members of the gut microbiota as the abundance of  
190 111 of them was higher than the median of the 1,845 HQMAGs and accounted for 20.78% of the  
191 total sequencing reads. Based on Bray-Curtis distance, beta-diversity analysis showed significant  
192 correlations between the profiles of the 141 GSEIs and all the 1,845 HQMAGs, as evidenced by  
193 Mantel test ( $R^2 = 0.62$ ,  $P = 0.001$ ) and Procrustes analysis ( $P = 0.001$ ) (Fig. S9, Fig. 1C, D).  
194 These indicate that the variations of the 141 GSEIs contributed to the major variations of the  
195 whole gut microbial community across the 3 time points.



196 Bacteria which are positively correlated with each other and show robust co-occurrence  
197 behavior can be recognized as ecological guilds<sup>9</sup>. The 141 GSEIs organized themselves into two  
198 guilds and genomes in each guild were highly interconnected with positive correlations. Fifty  
199 genomes were in Guild 1 and 91 genomes were in Guild 2 (Fig.2C, Fig. S10). All the genomes in  
200 Guild 1 were from the phylum Firmicutes whereas those in Guild 2 were from 5 different phyla,  
201 including Firmicutes, Bacteroidota, Proteobacteria, Actinobacteriota and Fusobacteriota. The two  
202 guilds were connected by negative edges only, indicating a competitive relationship. Members of  
203 Guild 1 increased its abundance from M0 to M3 and then decreased from M3 to M15 while  
204 members of Guild 2 showed an opposite abundance change (Fig. 2C). Thus, members within  
205 each guild had robust cooperative relationships, while competitive relationships existed between  
206 the two guilds (Fig. 2D). Our data showed that the two guilds of the 141 GESIs formed a stable  
207 seesaw-like network that existed in all three ecological networks  $G_{M0}$ ,  $G_{M3}$ , and  $G_{M15}$  in the W  
208 group. Furthermore, the finding of the seesaw-like network in the W group at M0 suggests that  
209 the existence of such microbial organization is supposed to be irrelevant to the high fiber  
210 intervention in our study. Given similar overall gut microbiota structure between the W and U  
211 groups at M0 and in the U group across 3 timepoints (Fig. 1C, D), we speculated that the seesaw-  
212 like network can be observed in the U group across the trial. Thus, we constructed the co-  
213 abundance networks based on the abundance of the 141 GESIs across the individuals in the U  
214 group at each time point. 99.8%, 99.51% and 99.74% of the total edges in the co-abundance  
215 networks agreed with our seesaw-like network (Fig. S11A). This suggests that the detection of  
216 these seesaw networked genomes was independent of the high fiber intervention, indicating that  
217 the seesaw-like network may be an inherent structure of the gut microbiome in our study.  
218

219 **Functionality of the metagenomes of the two competing guilds modulates host metabolic**  
220 **phenotypes**

221 We sought to determine whether the balance between the two competing guilds could be  
222 modulated by dietary fiber and describe how the two competing guilds affects the host metabolic  
223 phenotypes. In the W group, the total abundance of Guild 1 increased and Guild 2 decreased  
224 significantly from M0 to M3. Then at M15, Guild 1 decreased to a level similar to that at M0,  
225 and Guild 2 bounced back but remained lower than that at M0. Subsequently, from M0 to M3,  
226 high fiber intervention significantly increased the Guild 1 to Guild 2 ratio. At one-year follow-  
227 up, the ratio significantly decreased and was not different from M0 (Fig. 3A). Neither the  
228 abundances of the 2 guilds nor their ratio was changed in the U group across the trial (Fig.  
229 S11B). These results showed that the changes of the balance between the two guilds composed  
230 of GSEIs were concomitant with the change patterns of dietary intake, overall gut microbiota and  
231 host phenotypes. To further validate our hypothesis that GSEIs may be essential to host health,  
232 we used the GSEIs as the selected features and applied machine learning algorithms to explore  
233 the associations between GSEIs and each host bio-clinical parameter. Random Forest regression  
234 via leave-one-out cross-validation based on the 141 GSEIs showed 41 out of the 43 bio-clinical  
235 parameters with significant Pearson's correlation coefficient ranged from 0.11 to 0.44 (adjusted  
236 P value < 0.05) between the predicted and measured values (Fig. 3B). These results showed that  
237 the 141 genomes, as two competing guilds in a seesaw-like network, constitute an important  
238 microbiome signature for T2DM and the related metabolic phenotypes.

239 Next, we performed genome-centric analysis of the metagenomes of the two competing  
240 guilds to explore the genetic basis underlying the association between the dynamic changes of  
241 the seesaw networked microbiome signature and the response of the host's metabolic

242 phenotypes. As the balance between the two guilds can be shifted by dietary fibers, we first  
243 sought to identify carbohydrate-active enzyme (CAZy)-encoding genes and genes encoding key  
244 enzymes in short-chain fatty acids (SCFAs) production to compare the genetic capacity for  
245 carbohydrate utilization between the two guilds. Compared with genomes in Guild 2, those in  
246 Guild 1 enriched CAZy genes for arabinoxylan ( $P < 0.001$ ), cellulose ( $P < 0.01$ ) and had lower  
247 proportion of CAZy genes for inulin utilization ( $P < 0.01$ ) (Fig. 3C, Table S5). There was no  
248 difference in genes for starch, pectin, and mucin utilization between the two guilds. Our previous  
249 study showed that gut microbiota benefited patients with T2DM via acetic and butyric acid  
250 production from carbohydrate fermentation<sup>11</sup>. Among the terminal genes for the butyrate  
251 biosynthetic pathways from both carbohydrates (i.e., *but* and *buk*) and proteins (i.e., *atoA/D* and  
252 *4Hbt*), the copy number of *but* was significantly higher in Guild 1 and there was no difference in  
253 the other terminal genes between the two guilds (Fig. 3C). More than one-third of the genomes in  
254 Guild 1 harbored the *but* gene while less than 5% of the genomes in Guild 2 had this gene  
255 (Fisher's exact test  $P < 0.001$ ). Compared with Guild 2, Guild 1 also trended higher in its genetic  
256 capacity for acetate production ( $P = 0.06$ ) but a lower genetic capacity for propionate production  
257 ( $P < 0.05$ ) (Fig. 3C). These results showed that compared to Guild 2, Guild 1 had significantly  
258 higher genetic capacity for utilizing complex plant polysaccharides and producing acetate and  
259 butyrate.

260 From the perspective of pathogenicity, 21 out of the 1,845 HQMAGs encoded 750  
261 virulence factor (VF) genes. Among the 21 VF-encoding genomes, 3 were in Guild 1 while 18  
262 were in Guild 2. Three out of the 50 genomes in Guild 1 had one VF gene involved in  
263 antiphagocytosis. In Guild 2, 18 out of the 91 genomes encoded 747 VF genes across 15  
264 different VF classes i.e., acid resistance, adherence, antiphagocytosis, biofilm formation, efflux

265 pump, endotoxin, invasion, iron uptake, manganese uptake, motility, nutritional factor, protease,  
266 regulation, secretion system, and toxin (Fig. 3C, S12A). Notably, 98.53% of all the VF genes in  
267 Guild 2 were harbored in 8 genomes (1 in *Enterobacter kobei*, 2 in *Escherichia flexneri*, 3 in  
268 *Escherichia coli* and 2 in *Klebsiella*). The highly enriched genes for virulence factors in genomes  
269 of Guild 2 ( $P < 2.2 \times 10^{-16}$ , Fisher's Exact test) indicates that this guild may play an important role  
270 in aggravating the metabolic disease phenotypes. In terms of antibiotic resistance genes (ARG),  
271 in Guild 1, only 1 genome (2.00% of the genomes in this guild) harbored a copy of an ARG  
272 related to phenicol (Fig. 3C, S12B). In Guild 2, 17 genomes (18.68% of the genomes in this  
273 guild) encode 40 ARGs for resistance to 7 different antibiotic classes i.e., aminoglycosides, beta-  
274 lactam, fosfomicin, glycopeptide, quinolone, macrolide, and tetracycline. Thus, Guild 2 may  
275 serve as a reservoir of ARGs for horizontal transfer to opportunistic pathogens. Taken together,  
276 our data showed that the two competing guilds had distinct genetic capacity with Guild 1 being  
277 potentially beneficial and Guild 2 detrimental<sup>11</sup>.

278

## 279 **The seesaw networked microbiome signature exists in cohorts across ethnicity and** 280 **geography**

281 We then asked that whether these 141 genomes, organized as two competing guilds in a  
282 stable seesaw-like network, may be a common microbiome signature for different diseases in  
283 other independent metagenomically studied cohorts. To answer this question, we used these 141  
284 GSEIs in our seesaw-like network as reference genomes to perform read recruitment analysis,  
285 which is a commonly used method to estimate abundance of reference genomes<sup>22,23</sup> in  
286 metagenomes (Fig. S13). In an independent T2DM study<sup>24</sup>, 32.92% of the reads were recruited  
287 and 128 of the GSEIs were detected as part of a co-abundance network based on their estimated

288 abundance across the T2DM patients. In this co-abundance network, 97.82% of the total edges  
289 followed the pattern in our seesaw-like network (i.e., positive edges within each guild and  
290 negative edges between the 2 guilds) (Fig. 4A), which further supported the existence of this  
291 seesaw-like network in T2DM patients. Moreover, 35.28% of the reads were recruited in the  
292 metagenomes of 136 healthy controls of the same study<sup>24</sup>, 119 of the GSEIs were constructed  
293 into a co-abundance network in which 99.45 % of the total edges agreed with our seesaw-like  
294 network (Fig. 4A). In the context of beta diversity based on Bray-Curtis distance, our  
295 microbiome signature showed significant differences (PERMANOVA test  $P = 2 \times 10^{-4}$ ) between  
296 T2DM patients and the healthy controls based on the abundance matrix of the reference genomes  
297 (Fig. 4B). This suggests that the variation of this microbiome signature was associated with  
298 T2DM in this independent dataset. To further validate such associations, using the abundance  
299 matrix of the genomes in the microbiome signature as input features and the phenotype data, we  
300 constructed Random Forest regression models and found that this microbiome signature was  
301 significantly correlated with BMI, fasting insulin, and HbA1c (Fig S14). Furthermore, we  
302 developed a machine learning classifier based on a Random Forest algorithm to see if we can  
303 classify patients and control. Receiver operating characteristic curve analysis showed a moderate  
304 diagnostic power with area under the curve (AUC) of 0.70 by a leave-one-out cross-validation.  
305 Thus, we showed that our seesaw networked microbiome signature not only existed in an  
306 independent T2DM study but also maintained a similar relationship with the host metabolic  
307 phenotypes.

308 We then extended our hypothesis that the seesaw networked microbiome signature  
309 represents an inherent feature of human gut microbiome and the disruption of which may be  
310 related to diseases in addition to T2DM. We first performed the same validation analysis in

311 metagenomic datasets of three different types of diseases, including ACVD<sup>25</sup>(a chronic  
312 metabolic disease), LC<sup>26</sup> (a liver disease) and AS<sup>27</sup>(an autoimmune disease). In ACVD patients  
313 and their controls, 36.21% and 32.73% of the reads were recruited, and 134 genomes from the  
314 patients and 133 genomes from the controls were constructed into co-abundance networks with  
315 97.32% and 97.70% of the total edges respectively agreed with our seesaw-like network (Fig.  
316 4A). 33.84%, 35.83% and 41.02% of the reads were recruited to the reference genomes in the  
317 metagenomic datasets of the healthy control (the studies on LC and AS employed the same  
318 control cohort), LC and AS patients respectively. 112, 113 and 113 reference genomes were  
319 constructed into co-abundance networks with 99.80%, 98.81% and 98.19% of the total edges  
320 agreed with our seesaw-like network in the metagenomic datasets of the healthy control, LC and  
321 AS patients respectively (Fig. 4A). In the PCoA plot based on Bray-Curtis distance, our  
322 microbiome signature showed significant differences (PERMANOVA test,  $P < 0.001$ ) between  
323 control and patients in all 3 datasets (Fig. 4B). In the LC study, we also used the abundance  
324 matrix of the genomes in the microbiome signature as input features and the phenotype data to  
325 construct Random Forest regression models and found that our microbiome signature was  
326 significantly correlated with total bilirubin, albumin level, and BMI (Fig. S15). Compared with  
327 the T2DM dataset<sup>24</sup>, the Random Forest classifier based on our microbiome signature showed  
328 better diagnostic power in distinguishing case from control for ACVD (AUC = 0.80), LC (AUC  
329 = 0.90), and AS (AUC = 0.98) (Fig. 4C).

330 To further confirm the relevance of this microbiome signature to human diseases, we  
331 estimated the abundances of the genomes from this microbiome signature in datasets from more  
332 disease types and across different ethnicity and geography. These datasets included IBD  
333 (American cohort and Dutch cohort), CRC (Chinese cohort, Australian cohort and German

334 cohort), schizophrenia (Chinese cohort), and PD (Chinese cohort). On average,  $31.32\% \pm 4.21\%$   
335 (mean  $\pm$  s.d.) of reads were recruited to the reference genomes in these datasets. We validated  
336 that this microbiome signature showed diagnostic power to classify case and control in the  
337 metagenomic dataset from studies on IBD (AUC = 0.71 for IBD dataset 1<sup>28</sup>, AUC=0.91 for IBD  
338 dataset 2<sup>29</sup> and AUC=0.83 for IBD dataset 3<sup>29</sup>), CRC (AUC = 0.74 for CRC dataset 1<sup>30</sup>, AUC =  
339 0.75 for CRC dataset 2<sup>31</sup> and AUC = 0.71 for CRC dataset 3<sup>32</sup>), schizophrenia<sup>33</sup> (AUC = 0.68),  
340 and PD<sup>34</sup> (AUC = 0.77) (Fig. S16). In addition, we used MMUPHin<sup>35</sup> to correct batch effects  
341 from the different cohorts in IBD and CRC and applied leave-one-cohort-out (LOCO) analysis<sup>36</sup>  
342 to evaluate the universality of the diagnostic power of this microbiome signature in these two  
343 diseases. The AUC values from LOCO analysis were 0.77 to 0.84 for IBD and 0.68 to 0.70 for  
344 CRC (Fig. S17). These results showed the existence of our microbiome signature in healthy  
345 controls and various patient populations across ethnicity and geography from independent  
346 studies. The associations between the 141 genomes and host phenotypes and their discriminative  
347 power as biomarkers to classify controls vs. patients with various types of diseases indicate that  
348 these genomes, organized as two guilds in a seesaw-like network, represent a common  
349 microbiome signature associated with widely different human disease phenotypes.

350

## 351 **Discussion**

352 In the current study, our genome-centric, reference-free, and ecological-interaction-focused  
353 approach led to the identification of a robust seesaw-like network of two competing guilds of  
354 bacterial genomes, whose changes were associated with a wide range of host phenotypes in  
355 patients with T2DM. Moreover, random forest models based on these genomes classified case  
356 and control across a wide range of diseases, indicating that these genomes may form a novel

357 microbiome signature that exists in populations of widely different ethnicity, geography, and  
358 disease status.

359       Our novel microbiome signature organizes genomes in a seesaw-like network exhibiting  
360 both cooperative and competitive interactions. Though cooperative ecological networks are  
361 expected to promote overall metabolic efficiency, such as the co-operative metabolism that  
362 benefits the host<sup>37</sup>, it creates dependency and the potential for mutual downfall that may bring  
363 destabilizing effect on the gut microbial ecosystem. This destabilizing effect of cooperation can  
364 be dampened by introducing ecological competition into the network<sup>37</sup>. Thus, a seesaw-like  
365 network with both cooperative and competitive interactions may represent the key characteristic  
366 of a stable microbiome structure<sup>37</sup>. Interestingly, while the seesaw-like network is stable, the  
367 weight of the two ends i.e., the abundances of Guild 1 and Guild 2, are modifiable and such  
368 changes are associated with host health. When large amount of complex fiber became available,  
369 Guilds 1 and 2 showed no change in membership nor in the types of interactions with each other  
370 but experienced dramatic shifts in guild-level abundance in a competing manner. Members in  
371 Guild 1 have higher genetic capacity for degrading complex plant polysaccharides and produce  
372 beneficial metabolites including SCFAs which may suppress populations of pathobionts in Guild  
373 2<sup>11</sup>. Members of Guild 2 need to be kept low since their overgrowth may jeopardize host health  
374 by increasing inflammation, etc.<sup>38</sup>. However, pathobionts in Guild 2 cannot be eliminated, e.g.,  
375 they could serve as the necessary agents that train our immune system from early days<sup>39,40</sup>.  
376 Therefore, the balance between Guild 1 and Guild 2 becomes critical in determining whether the  
377 gut microbiome supports health or aggravate diseases. This seesaw-like network between Guilds  
378 1 and 2 allows the genomes in our microbiome signature to readily respond to changes of  
379 external energy input to the gut microbial ecosystem and mediate its impact on host health, while



380 simultaneously maintains its structural integrity. Such structural integrity may be key to long-  
381 term ecological stability of the gut microbiome and its ability to provide essential health-relevant  
382 functions to the host.

383       Such a seesaw networked structure may have been stabilized by natural selection over a  
384 long history of co-evolution between microbiomes and their hosts<sup>16 41</sup>. A selection pressure may  
385 have been exerted by dietary fibers that interact directly with gut bacteria as external energy  
386 source<sup>42,43</sup>. Studies on coprolites showed that dietary fiber intake was much higher in ancient  
387 humans and only reduced significantly in the past 150 years<sup>44,45</sup> (130 g/d of plant fiber intake in  
388 prehistoric diet<sup>46</sup> vs. a median intake of 12–14 g/d in the modern American diet<sup>47</sup>). Such a high  
389 fiber intake over evolutionary history may have favored beneficial bacteria in Guild 1 due to  
390 their higher genetic capacity to utilize plant polysaccharides as an external energy supply,  
391 enabling them to gain competitive advantage over pathobionts in Guild 2<sup>48</sup>. Akin to tall trees as  
392 the foundation species for a closed forest, Guild 1 may work as the “foundation guild” for  
393 stabilizing a healthy gut microbiome and keeping the pathobionts at bay<sup>49</sup>. The dominance of  
394 Guild 1 over Guild 2 can increase host fitness as shown by the epidemiologically and clinically  
395 proven health benefits of dietary fibers in both preventing and alleviating a wide range of chronic  
396 conditions<sup>11,43,50,51</sup>.

397       Moreover, the seesaw networked microbiome signature may be considered as part of the  
398 core gut microbiome in humans<sup>52,53</sup>, since 1) they are commonly shared among populations  
399 across ethnicity and geography; 2) they show temporal stability not only in membership but also  
400 in their interactions with each other and the host; 3) they make up about 10% of the gut  
401 microbiome membership but are disproportionally important for shaping the ecological  
402 community; 4) they support the provision of essential health-relevant functions to the host; and

403 5) such a core microbiome organized in a seesaw-like network may have been established over a  
404 long history of co-evolution.

405 The fact that this seesaw-like network can be detected in other independent metagenomic  
406 datasets and is shown correlated with different diseases indicates that this core microbiome  
407 signature could be an evolutionarily conserved ecological structure and may be fundamentally  
408 important to human health recovery and maintenance. In addition, our seesaw-like network  
409 demonstrated stable relationships both internally within the network and externally with multiple  
410 host clinical markers, suggesting that genome-based bacterial guilds may serve as robust disease  
411 biomarkers. Within the seesaw-like network, it is the imbalance between the two competing  
412 guilds that may play a role as the common biological basis for many human diseases. Targeting  
413 this core microbiome signature to restore and maintain dominance of the beneficial guild over  
414 the detrimental guild could help reduce disease risk or alleviate symptoms, thus opening a new  
415 avenue for chronic diseases management and prevention.

416

## 417 **Materials and Methods**

### 418 **Clinical Experiment**

419 **Study design**<sup>11</sup>: This clinical trial, conducted at the Qidong People's Hospital (Jiangsu, China),  
420 examined the effect of a high fiber diet in free-living conditions in a cohort of individuals  
421 clinically diagnosed T2DM (QIDONG). The study protocol was approved by Ethics Committee  
422 of Shanghai General Hospital (2014KY104), and the study was conducted in accordance with the  
423 principles of the Declaration of Helsinki. All participants provided written informed consent. The  
424 trial was registered in the Chinese Clinical Trial Registry (ChiCTR-IPC-14005346). The study  
425 design and participant flow are shown in Fig. S1.

426 T2DM patients of the Chinese Han ethnicity were recruited for the study (age: 37 - 70 years;  
427 HbA1c: 6.5% - 12.0%. More detailed description of inclusion and exclusion criteria were shown  
428 in Chinese Clinical Trial registry (<http://www.chictr.org.cn>).

429 Patients received either a high-fiber diet (WTP diet) as the treatment group (W group) or the  
430 usual care (Usual diet) as the control group (U group) for 3 months. Total caloric and  
431 macronutrients prescriptions were based on age-specific Chinese Dietary Reference Intakes  
432 (Chinese Nutrition Society, 2013). The WTP diet, based on wholegrains, traditional Chinese  
433 medicinal foods and prebiotics, included three ready-to-consume pre-prepared foods<sup>11</sup>. The usual  
434 care included standard dietary and exercise advice that was made according to the Chinese  
435 Diabetes Society guidelines for T2DM<sup>54</sup>. Patients in W group were provided with the WTP diet  
436 to perform a self-administered intervention at home for three months, while patients in U group  
437 accepted the usual care. W group stopped WTP diet intervention at the end of the third month (at  
438 M3). Then W and U continued a one-year follow-up (M15). A meal-based food frequency  
439 questionnaire and 24-h dietary recall were used to calculate nutrient intake based on the China  
440 Food Composition 2009<sup>55</sup>. Patients in both groups continued with their antidiabetic medications  
441 according to their physician prescriptions (Table S1).

442 Before a 2-week run-in period, all participants attended a lecture on diabetes intervention and  
443 improvements and received diabetes education and metabolic assessments. 119 eligible  
444 individuals were enrolled based on the inclusion and exclusion criteria and assigned into two  
445 groups in a 2:1 ratio (n = 79 in W group, n = 40 in U group) determined by SAS software.

446 Physical examinations were carried out at M0, M3, and M15 in Qidong People's Hospital  
447 (Jiangsu, China). Sample collection instructions were provided to the participants at the day  
448 before. The participants provided the feces and first early morning urine as requested. After

449 collecting fasting venous blood sample, a 3-h meal tolerance test (Chinese buns containing 75 g  
450 of available carbohydrates; MTT test) was conducted and the postprandial venous blood samples  
451 at 30, 60, 120, and 180 min were collected. All the blood samples were centrifuged at 3000 rpm  
452 for 20 min at 4°C after standing at room temperature for 30 min to obtain serum. The fasting  
453 blood serum were divided into two parts, one used for hospital tests and the other used for lab  
454 tests. The feces, urine, and serum samples were stored in dry ice immediately then transported to  
455 lab and frozen at -80°C. Subsequently, anthropometric markers and diabetic complication  
456 indexes were measured. Ewing test<sup>56</sup> and 24-h dynamic electrocardiogram were conducted to  
457 estimate diabetic autonomic neuropathy (DAN). B-mode carotid ultrasound was conducted to  
458 estimate atherosclerosis. Michigan Neuropathy Screening Instrument<sup>57</sup> was conducted to  
459 estimate diabetic peripheral neuropathy (DPN). In addition, A meal-based food frequency  
460 questionnaire and the 24-h dietary review were recorded for nutrient intake calculation. The drug  
461 use was self-reported and presented in table S1.

462 The fasting venous blood was used to measure HbA1c, fasting blood glucose, fasting insulin,  
463 fasting C-Peptide, C-reactive protein (CRP), blood routine examination, blood biochemical  
464 examination and five analytes of thyroid. The venous blood samples at 30, 60, 120, and 180 min  
465 of MTT were used to measure the postprandial blood glucose, insulin, and C-Peptide. The  
466 fasting early morning urine was used to measure the routine urine examination and urinary  
467 microalbumin creatinine ratio. The measurements above were completed at Qidong People's  
468 Hospital. Fasting venous blood was used to quantify TNF- $\alpha$  (R&D Systems, MN, USA),  
469 lipopolysaccharide-binding protein (Hycult Biotech, PA, USA), leptin (P&C, PCDBH0287,  
470 China) and adiponectin (P&C, PCDBH0016, China) by enzyme-linked immunosorbent assays  
471 (ELISAs) at Shanghai Jiao Tong University.

472 The homeostatic model assessments of insulin resistance (HOMA-IR) and islet  $\beta$ -cell function  
473 (HOMA- $\beta$ ) were calculated based on fasting blood glucose (mmol/L) and fasting C-Peptide  
474 (pmol/L)<sup>58</sup>:  $HOMA-IR = 1.5 + FBG * Fasting-C-Peptide / 2800$ ;  
475  $HOMA-\beta = 0.27 * Fasting-C-Peptide / (FBG - 3.5)$ . Glomerular Filtration Rate was estimated by  
476 formula  $GFR (ml/min \text{ per } 1.73 \text{ m}^2) = 186 * Scr^{-1.154} * age^{-0.203} * 0.742 \text{ (if female)} * 1.233 \text{ (if}$   
477  $Chinese)^{59}$ , where Scr (serum creatinine) is in mg/dl and age is in years.

478

### 479 **Gut microbiome analysis**

480 **Metagenomic sequencing.** DNA was extracted from fecal samples using the methods as  
481 previously described<sup>10</sup>. Metagenomic sequencing was performed using Illumina Hiseq 3000 at  
482 GENEWIZ Co. (Beijing, China). Cluster generation, template hybridization, isothermal  
483 amplification, linearization, and blocking denaturing and hybridization of the sequencing primers  
484 were performed according to the workflow specified by the service provider. Libraries were  
485 constructed with an insert size of approximately 500 bp followed by high-throughput sequencing  
486 to obtain paired-end reads with 150 bp in the forward and reverse directions. Table S3 shows the  
487 number of raw reads of each sample.

488

489 **Data quality control.** Prinseq<sup>60</sup> was used to: 1) trim the reads from the 3' end until reaching the  
490 first nucleotide with a quality threshold of 20; 2) remove read pairs when either read was < 60 bp  
491 or contained "N" bases; and 3) de-duplicate the reads. Reads that could be aligned to the human  
492 genome (H. sapiens, UCSC hg19) were removed (aligned with Bowtie2<sup>61</sup> using --reorder --no-hd  
493 --no-contain --dovetail). Table S3 shows the number of high-quality reads of each sample for  
494 further analysis.

495

496 **De novo assembly, abundance calculation, and taxonomic assignment of genomes.** De novo  
497 assembly was performed for each sample by using IDBA\_UD<sup>62</sup> (--step 20 --mink 20 --maxk 100  
498 --min\_contig 500 --pre\_correction). The assembled contigs were further binned using  
499 MetaBAT<sup>63</sup> (--minContig 1500 --superspecific -B 20). The quality of the bins was assessed  
500 using CheckM<sup>64</sup>. Bins had completeness > 95%, contamination < 5% and strain heterogeneity <  
501 5% were retained as high-quality draft genomes (Table S6). The assembled high-quality draft  
502 genomes were further dereplicated by using dRep<sup>65</sup>. DiTASiC<sup>66</sup>, which applied kallisto for  
503 pseudo-alignment<sup>67</sup> and a generalized linear model for resolving shared reads among genomes,  
504 was used to calculate the abundance of the genomes in each sample, estimated counts with P-  
505 value > 0.05 were removed, and all samples were downsized to 36 million reads (One sample  
506 with read mapping ratio < 25%, which could not be well represented by the high quality  
507 genomes, were removed in downstream analysis). Taxonomic assignment of the genomes was  
508 performed by using GTDB-Tk<sup>68</sup> (Table S7).

509

510 **Gut microbiome functional analysis.** Prokka<sup>69</sup> was used to annotate the genomes. KEGG  
511 Orthologue (KO) IDs were assigned to the predicted protein sequences in each genome by  
512 HMMSEARCH against KOfam using KofamKOALA<sup>70</sup>. Antibiotic resistance genes were  
513 predicted using ResFinder<sup>71</sup> with default parameters. The identification of virulence factors were  
514 based on the core set of Virulence Factors of Pathogenic Bacteria Database (VFDB<sup>72</sup>, download  
515 July 2020). The predicted proteins sequences were aligned to the reference sequence in VFDB  
516 using BLASTP (best hist with E-value < 1e-5, identity > 80% and query coverage > 70%).  
517 Genes encoding carbohydrate-active enzymes (CAZys) were identified using dbCAN (releasee

518 6.0)<sup>73</sup>, and the best-hit alignment was retained. Genes encoding formate-tetrahydrofolate ligase,  
519 propionyl-CoA: succinate-CoA transferase, propionate CoA-transferase, 4Hbt, AtoA, AtoD, Buk  
520 and But were identified as described previously<sup>11</sup>.

521

522 **Gut microbiome network construction and analysis.** In W group, prevalent genomes shared  
523 by more than 75% of the samples at every timepoint were used to construct the co-abundance  
524 network at each timepoint. Fastspar<sup>75</sup>, a rapid and scalable correlation estimation tool for  
525 microbiome study, was used to calculate the correlations between the genomes with 1,000  
526 permutations at each time point based on the abundances of the genomes across the patients and  
527 the correlations with  $P \leq 0.001$  were retained for further analysis. The networks were visualized  
528 with Cytoscape v3.8.1<sup>76</sup>. The layout of the nodes and edges was determined by Edge-weighted  
529 Spring Embedded Layout using the correlation coefficient as weights. The links between the  
530 nodes are treated as metal springs attached to the pair of nodes. The correlation coefficient was  
531 used to determine the repulsion and attraction of the spring<sup>76</sup>. The layout algorithm sets the  
532 position of the nodes to minimize the sum of forces in the network. We defined robust stable  
533 edges as the unchanged positive/negative correlations between the same two genomes across all  
534 the 3 networks at M0, M3, and M15. Stable genome pairs were clustered based on robust  
535 positive (set as 1) and negative (set as -1) edges with average clustering. We used iTOL<sup>77</sup>, an  
536 online tool for display, manipulation, and annotation for various trees, to integrate and visualize  
537 the clustering tree, taxonomy information, and abundance changes of the 141 genomes.

538

539 **Validation in independent cohorts.** Twelve independent metagenomic datasets were  
540 downloaded from SRA or ENA database. The group information was collected from the

541 corresponding papers or from curatedMetagenomicData<sup>78</sup> (Table S8). DiTASiC was used to  
542 recruit reads and estimate the abundance of the 141 genomes in each sample, estimated counts  
543 with P-value > 0.05 were removed and further converted to relative abundance divided by the  
544 total number of reads. To reduce false positive in the validation dataset, relative abundance <  
545 0.001% were further removed. A random forest classification model to classify case and control  
546 was constructed based on the estimated abundances of the genomes in each dataset with leave-  
547 one-out cross-validation.

548 MMUPHin<sup>35</sup> was used to adjust the estimated abundances of the genomes by correcting  
549 batched effects from the different cohorts in IBD and CRC studies. Random forest classification  
550 models with leave-one-cohort-out analysis were further performed on the adjusted abundance  
551 matrix<sup>36</sup>.

552 Datasets from 4 studies were included to validate the commonality of the seesaw-like  
553 network. These datasets were from 136 control and 136 T2DM individuals in Qin et al., 2012<sup>24</sup>;  
554 171 control and 214 atherosclerotic cardiovascular disease individuals in Jie et al., 2017<sup>25</sup>; 83  
555 control and 84 liver cirrhosis individuals in Qin et al., 2014<sup>26</sup>; and 83 control and 97 ankylosing  
556 spondylitis individuals in Wen et al., 2017<sup>27</sup>. Fastspar was used to calculate the correlations  
557 between the genomes with 1,000 permutations and the correlations with  $P \leq 0.001$  were  
558 remained for constructing the networks. 30 repeat 5-fold cross-validation was used and the  
559 correlations shared by more than 95% of the 150 networks constructed from the cross-validation  
560 process were remained in the final network.

561

562 **Statistical Analysis**



563 Statistical analysis was performed in the R environment (R version3.6.1). Friedman test  
564 followed by Nemenyi post-hoc test was used for intra-group comparisons. Mann-Whitney test  
565 (two-sided) was used for comparisons between W and U at the same time point. Pearson Chi-  
566 square tests was performed to compare the differences of categorical data between groups or  
567 timepoints. PERMANOVA test (9,999 permutations) was used to compare the groups of gut  
568 microbiota structure. P value less than 0.05 was accepted as statistical significance.

569 Mann-Whitney test (two-sided) and Fisher's exact test (two sided) were used to compare  
570 the functions between Guild 1 and Guild 2. Random Forest with leave-one-out cross-validation  
571 was used to perform regression and classification analysis based on this microbiome signature  
572 and clinical parameters/groups.

573

#### 574 **Acknowledgements**

575 This work was supported by grants from National Natural Science Foundation of China  
576 (31930022, 81871091, 81870594 and 81870596), the National Key Research and Development  
577 Project (2019YFA0905600), Clinical Research Plan of SHDC [No. SHDC2020CR1016B], the  
578 Project of Songjiang District Municipal Health Commission (0702N18003), the School of  
579 Environmental and Biological Sciences and the New Jersey Institute for Food, Nutrition, and  
580 Health (seed pilot grant cycle 1, awarded in 2019), Canadian Institute for Advanced Research  
581 and Notitia Biotechnologies Company.

582

#### 583 **Conflict of interest**

584 Liping Zhao is a co-founder of Notitia Biotechnologies Company.

585

## 586 Reference

- 587 1 Dominguez-Bello, M. G., Godoy-Vitorino, F., Knight, R. & Blaser, M. J. Role of the  
588 microbiome in human development. *Gut* **68**, 1108-1114, doi:10.1136/gutjnl-2018-  
589 317503 (2019).
- 590 2 Kundu, P., Blacher, E., Elinav, E. & Pettersson, S. Our Gut Microbiome: The Evolving  
591 Inner Self. *Cell* **171**, 1481-1493, doi:10.1016/j.cell.2017.11.024 (2017).
- 592 3 O'Hara, A. M. & Shanahan, F. The gut flora as a forgotten organ. *Embo Rep* **7**, 688-693,  
593 doi:10.1038/sj.embor.7400731 (2006).
- 594 4 Koh, A. & Backhed, F. From Association to Causality: the Role of the Gut Microbiota and  
595 Its Functional Products on Host Metabolism. *Mol Cell* **78**, 584-596,  
596 doi:10.1016/j.molcel.2020.03.005 (2020).
- 597 5 Sanna, S. *et al.* Causal relationships among the gut microbiome, short-chain fatty acids  
598 and metabolic diseases. *Nat Genet* **51**, 600+, doi:10.1038/s41588-019-0350-x (2019).
- 599 6 Meijnikman, A. S., Gerdes, V. E., Nieuwdorp, M. & Herrema, H. Evaluating Causality of  
600 Gut Microbiota in Obesity and Diabetes in Humans. *Endocr Rev* **39**, 133-153,  
601 doi:10.1210/er.2017-00192 (2018).
- 602 7 Levin, S. A. Ecosystems and the biosphere as complex adaptive systems. *Ecosystems* **1**,  
603 431-436 (1998).
- 604 8 Zhang, C. & Zhao, L. Strain-level dissection of the contribution of the gut microbiome to  
605 human metabolic disease. *Genome Med* **8**, 41, doi:10.1186/s13073-016-0304-1 (2016).
- 606 9 Wu, G., Zhao, N., Zhang, C., Lam, Y. Y. & Zhao, L. Guild-based analysis for understanding  
607 gut microbiome in human health and diseases. *Genome Medicine* **13**, 22,  
608 doi:10.1186/s13073-021-00840-y (2021).
- 609 10 Zhang, C. H. *et al.* Dietary Modulation of Gut Microbiota Contributes to Alleviation of  
610 Both Genetic and Simple Obesity in Children. *Ebiomedicine* **2**, 968-984,  
611 doi:10.1016/j.ebiom.2015.07.007 (2015).
- 612 11 Zhao, L. *et al.* Gut bacteria selectively promoted by dietary fibers alleviate type 2  
613 diabetes. *Science* **359**, 1151-1156 (2018).
- 614 12 Tierney, B. T., Tan, Y., Kostic, A. D. & Patel, C. J. Gene-level metagenomic architectures  
615 across diseases yield high-resolution microbiome diagnostic indicators. *Nat Commun* **12**,  
616 2907, doi:10.1038/s41467-021-23029-8 (2021).
- 617 13 Wang, J. & Jia, H. Metagenome-wide association studies: fine-mining the microbiome.  
618 *Nat Rev Microbiol* **14**, 508-522, doi:10.1038/nrmicro.2016.83 (2016).
- 619 14 Duvallet, C., Gibbons, S. M., Gurry, T., Irizarry, R. A. & Alm, E. J. Meta-analysis of gut  
620 microbiome studies identifies disease-specific and shared responses. *Nat Commun* **8**,  
621 1784, doi:10.1038/s41467-017-01973-8 (2017).
- 622 15 Jackson, M. A. *et al.* Gut microbiota associations with common diseases and prescription  
623 medications in a population-based cohort. *Nat Commun* **9**, 2655, doi:10.1038/s41467-  
624 018-05184-7 (2018).
- 625 16 Foster, K. R., Chluter, J. S., Oyte, K. Z. C. & Rakoff-Nahoum, S. The evolution of the host  
626 microbiome as an ecosystem on a leash. *Nature* **548**, 43-51, doi:10.1038/nature23292  
627 (2017).

- 628 17 Sommer, F., Anderson, J. M., Bharti, R., Raes, J. & Rosenstiel, P. The resilience of the  
629 intestinal microbiota influences health and disease. *Nat Rev Microbiol* **15**, 630-638,  
630 doi:10.1038/nrmicro.2017.58 (2017).
- 631 18 Ma, B. *et al.* Earth microbial co-occurrence network reveals interconnection pattern  
632 across microbiomes. *Microbiome* **8**, 82, doi:10.1186/s40168-020-00857-2 (2020).
- 633 19 Bauer, E. & Thiele, I. From Network Analysis to Functional Metabolic Modeling of the  
634 Human Gut Microbiota. *mSystems* **3**, doi:10.1128/mSystems.00209-17 (2018).
- 635 20 Poisot, T. & Gravel, D. When is an ecological network complex? Connectance drives  
636 degree distribution and emerging network properties. *PeerJ* **2**, e251,  
637 doi:10.7717/peerj.251 (2014).
- 638 21 Barabasi, A. L. Network science. *Philos Trans A Math Phys Eng Sci* **371**, 20120375,  
639 doi:10.1098/rsta.2012.0375 (2013).
- 640 22 Nayfach, S. *et al.* A genomic catalog of Earth's microbiomes. *Nat Biotechnol* **39**, 499-509,  
641 doi:10.1038/s41587-020-0718-6 (2021).
- 642 23 Reji, L., Cardarelli, E. L., Boye, K., Bargar, J. R. & Francis, C. A. Diverse ecophysiological  
643 adaptations of subsurface Thaumarchaeota in floodplain sediments revealed through  
644 genome-resolved metagenomics. *ISME J*, doi:10.1038/s41396-021-01167-7 (2021).
- 645 24 Qin, J. *et al.* A metagenome-wide association study of gut microbiota in type 2 diabetes.  
646 *Nature* **490**, 55-60, doi:10.1038/nature11450 (2012).
- 647 25 Jie, Z. *et al.* The gut microbiome in atherosclerotic cardiovascular disease. *Nat Commun*  
648 **8**, 845, doi:10.1038/s41467-017-00900-1 (2017).
- 649 26 Qin, N. *et al.* Alterations of the human gut microbiome in liver cirrhosis. *Nature* **513**, 59-  
650 64, doi:10.1038/nature13568 (2014).
- 651 27 Wen, C. *et al.* Quantitative metagenomics reveals unique gut microbiome biomarkers in  
652 ankylosing spondylitis. *Genome Biol* **18**, 142, doi:10.1186/s13059-017-1271-6 (2017).
- 653 28 Lloyd-Price, J. *et al.* Multi-omics of the gut microbial ecosystem in inflammatory bowel  
654 diseases. *Nature* **569**, 655-662, doi:10.1038/s41586-019-1237-9 (2019).
- 655 29 Franzosa, E. A. *et al.* Gut microbiome structure and metabolic activity in inflammatory  
656 bowel disease. *Nat Microbiol* **4**, 293-305, doi:10.1038/s41564-018-0306-4 (2019).
- 657 30 Yu, J. *et al.* Metagenomic analysis of faecal microbiome as a tool towards targeted non-  
658 invasive biomarkers for colorectal cancer. *Gut* **66**, 70-+, doi:DOI 10.1136/gutjnl-2015-  
659 309800 (2017).
- 660 31 Feng, Q. *et al.* Gut microbiome development along the colorectal adenoma-carcinoma  
661 sequence. *Nat Commun* **6**, 6528, doi:10.1038/ncomms7528 (2015).
- 662 32 Wirbel, J. *et al.* Meta-analysis of fecal metagenomes reveals global microbial signatures  
663 that are specific for colorectal cancer. *Nat Med* **25**, 679-689, doi:10.1038/s41591-019-  
664 0406-6 (2019).
- 665 33 Zhu, F. *et al.* Metagenome-wide association of gut microbiome features for  
666 schizophrenia. *Nat Commun* **11**, 1612, doi:10.1038/s41467-020-15457-9 (2020).
- 667 34 Qian, Y. W. *et al.* Gut metagenomics-derived genes as potential biomarkers of  
668 Parkinson's disease. *Brain* **143**, 2474-2489 (2020).
- 669 35 Ma, S. *et al.* Population Structure Discovery in Meta-Analyzed Microbial Communities  
670 and Inflammatory Bowel Disease. *bioRxiv*, 2020.2008.2031.261214,  
671 doi:10.1101/2020.08.31.261214 (2020).

- 672 36 Wu, Y. *et al.* Identification of microbial markers across populations in early detection of  
673 colorectal cancer. *Nat Commun* **12**, 3063, doi:10.1038/s41467-021-23265-y (2021).
- 674 37 Coyte, K. Z., Schluter, J. & Foster, K. R. The ecology of the microbiome: Networks,  
675 competition, and stability. *Science* **350**, 663-666, doi:10.1126/science.aad2602 (2015).
- 676 38 Kamada, N., Seo, S. U., Chen, G. Y. & Nunez, G. Role of the gut microbiota in immunity  
677 and inflammatory disease. *Nat Rev Immunol* **13**, 321-335, doi:10.1038/nri3430 (2013).
- 678 39 Vatanen, T. *et al.* Variation in Microbiome LPS Immunogenicity Contributes to  
679 Autoimmunity in Humans. *Cell* **165**, 1551, doi:10.1016/j.cell.2016.05.056 (2016).
- 680 40 Bach, J. F. The hygiene hypothesis in autoimmunity: the role of pathogens and  
681 commensals. *Nat Rev Immunol* **18**, 105-120, doi:10.1038/nri.2017.111 (2018).
- 682 41 Risely, A. Applying the core microbiome to understand host-microbe systems. *Journal of*  
683 *Animal Ecology* **89**, 1549-1558 (2020).
- 684 42 Makki, K., Deehan, E. C., Walter, J. & Backhed, F. The Impact of Dietary Fiber on Gut  
685 Microbiota in Host Health and Disease. *Cell Host Microbe* **23**, 705-715,  
686 doi:10.1016/j.chom.2018.05.012 (2018).
- 687 43 Reynolds, A. *et al.* Carbohydrate quality and human health: a series of systematic  
688 reviews and meta-analyses. *The Lancet* **393**, 434-445 (2019).
- 689 44 Eaton, S. B. The ancestral human diet: what was it and should it be a paradigm for  
690 contemporary nutrition ? *P Nutr Soc* **65**, 1-6, doi:10.1079/Pns2005471 (2006).
- 691 45 Jew, S., AbuMweis, S. S. & Jones, P. J. Evolution of the human diet: linking our ancestral  
692 diet to modern functional foods as a means of chronic disease prevention. *J Med Food*  
693 **12**, 925-934, doi:10.1089/jmf.2008.0268 (2009).
- 694 46 Spiller, G. A. & Amen, R. J. *Topics in dietary fiber research*. (Springer, 1978).
- 695 47 Thompson, H. J. & Brick, M. A. Perspective: Closing the dietary fiber gap: An ancient  
696 solution for a 21st century problem. *Advances in Nutrition* **7**, 623-626 (2016).
- 697 48 Deehan, E. C. *et al.* Modulation of the gastrointestinal microbiome with nondigestible  
698 fermentable carbohydrates to improve human health. *Microbiology spectrum* **5**, 5.5. 04  
699 (2017).
- 700 49 Prevey, J. S., Germino, M. J. & Huntly, N. J. Loss of foundation species increases  
701 population growth of exotic forbs in sagebrush steppe. *Ecol Appl* **20**, 1890-1902,  
702 doi:10.1890/09-0750.1 (2010).
- 703 50 Anderson, J. W. *et al.* Health benefits of dietary fiber. *Nutr Rev* **67**, 188-205,  
704 doi:10.1111/j.1753-4887.2009.00189.x (2009).
- 705 51 Kaczmarczyk, M. M., Miller, M. J. & Freund, G. G. The health benefits of dietary fiber:  
706 beyond the usual suspects of type 2 diabetes mellitus, cardiovascular disease and colon  
707 cancer. *Metabolism* **61**, 1058-1066, doi:10.1016/j.metabol.2012.01.017 (2012).
- 708 52 Risely, A. Applying the core microbiome to understand host-microbe systems. *J Anim*  
709 *Ecol* **89**, 1549-1558, doi:10.1111/1365-2656.13229 (2020).
- 710 53 Berg, G. *et al.* Microbiome definition re-visited: old concepts and new challenges.  
711 *Microbiome* **8**, 103, doi:10.1186/s40168-020-00875-0 (2020).
- 712 54 Society, C. D. China guideline for type 2 diabetes (2013 edition). *Chin J Diabetes* **22**  
713 (2014).
- 714 55 yuexin, Y., guangya, W. & xingchang, P. China Food Composition (Book 1, Beijing Medical  
715 Univ. Press, ed. 2, 2009). (2009).

- 716 56 Ewing, D. & Clarke, B. Diagnosis and management of diabetic autonomic. *British Medical*  
717 *Journal* **285** (1982).
- 718 57 Feldman, E. L. *et al.* A Practical Two-Step Quantitative Clinical and Electrophysiological  
719 Assessment for the Diagnosis and Staging of Diabetic Neuropathy. *Diabetes Care* **17**,  
720 1281-1289 (1994).
- 721 58 Li, X., Zhou, Z. G., Qi, H. Y., Chen, X. Y. & Huang, G. Replacement of insulin by fasting C-  
722 peptide in modified homeostasis model assessment to evaluate insulin resistance and  
723 islet beta cell function. *Zhong Nan Da Xue Xue Bao Yi Xue Ban* **29**, 419-423 (2004).
- 724 59 Ma, Y. C. *et al.* Modified glomerular filtration rate estimating equation for Chinese  
725 patients with chronic kidney disease. *J Am Soc Nephrol* **17**, 2937-2944,  
726 doi:10.1681/ASN.2006040368 (2006).
- 727 60 Schmieder, R. & Edwards, R. Quality control and preprocessing of metagenomic  
728 datasets. *Bioinformatics* **27**, 863-864, doi:10.1093/bioinformatics/btr026 (2011).
- 729 61 Langmead, B. & Salzberg, S. L. Fast gapped-read alignment with Bowtie 2. *Nat Methods*  
730 **9**, 357-359, doi:10.1038/nmeth.1923 (2012).
- 731 62 Peng, Y., Leung, H. C., Yiu, S. M. & Chin, F. Y. IDBA-UD: a de novo assembler for single-  
732 cell and metagenomic sequencing data with highly uneven depth. *Bioinformatics* **28**,  
733 1420-1428, doi:10.1093/bioinformatics/bts174 (2012).
- 734 63 Kang, D. D., Froula, J., Egan, R. & Wang, Z. MetaBAT, an efficient tool for accurately  
735 reconstructing single genomes from complex microbial communities. *PeerJ* **3**, e1165,  
736 doi:10.7717/peerj.1165 (2015).
- 737 64 Parks, D. H., Imelfort, M., Skennerton, C. T., Hugenholtz, P. & Tyson, G. W. CheckM:  
738 assessing the quality of microbial genomes recovered from isolates, single cells, and  
739 metagenomes. *Genome Res* **25**, 1043-1055, doi:10.1101/gr.186072.114 (2015).
- 740 65 Olm, M. R., Brown, C. T., Brooks, B. & Banfield, J. F. dRep: a tool for fast and accurate  
741 genomic comparisons that enables improved genome recovery from metagenomes  
742 through de-replication. *ISME J* **11**, 2864-2868, doi:10.1038/ismej.2017.126 (2017).
- 743 66 Fischer, M., Strauch, B. & Renard, B. Y. Abundance estimation and differential testing on  
744 strain level in metagenomics data. *Bioinformatics* **33**, i124-i132,  
745 doi:10.1093/bioinformatics/btx237 (2017).
- 746 67 Bray, N. L., Pimentel, H., Melsted, P. & Pachter, L. Near-optimal probabilistic RNA-seq  
747 quantification. *Nat Biotechnol* **34**, 525-527, doi:10.1038/nbt.3519 (2016).
- 748 68 Chaumeil, P. A., Mussig, A. J., Hugenholtz, P. & Parks, D. H. GTDB-Tk: a toolkit to classify  
749 genomes with the Genome Taxonomy Database. *Bioinformatics*,  
750 doi:10.1093/bioinformatics/btz848 (2019).
- 751 69 Seemann, T. Prokka: rapid prokaryotic genome annotation. *Bioinformatics* **30**, 2068-  
752 2069, doi:10.1093/bioinformatics/btu153 (2014).
- 753 70 Aramaki, T. *et al.* KofamKOALA: KEGG Ortholog assignment based on profile HMM and  
754 adaptive score threshold. *Bioinformatics* **36**, 2251-2252,  
755 doi:10.1093/bioinformatics/btz859 (2020).
- 756 71 Zankari, E. *et al.* Identification of acquired antimicrobial resistance genes. *J Antimicrob*  
757 *Chemother* **67**, 2640-2644, doi:10.1093/jac/dks261 (2012).

- 758 72 Liu, B., Zheng, D., Jin, Q., Chen, L. & Yang, J. VFDB 2019: a comparative pathogenomic  
759 platform with an interactive web interface. *Nucleic Acids Res* **47**, D687-D692,  
760 doi:10.1093/nar/gky1080 (2019).
- 761 73 Yin, Y. *et al.* dbCAN: a web resource for automated carbohydrate-active enzyme  
762 annotation. *Nucleic Acids Res* **40**, W445-451, doi:10.1093/nar/gks479 (2012).
- 763 74 Bortolaia, V. *et al.* ResFinder 4.0 for predictions of phenotypes from genotypes. *J*  
764 *Antimicrob Chemother* **75**, 3491-3500, doi:10.1093/jac/dkaa345 (2020).
- 765 75 Watts, S. C., Ritchie, S. C., Inouye, M. & Holt, K. E. FastSpar: rapid and scalable  
766 correlation estimation for compositional data. *Bioinformatics* **35**, 1064-1066,  
767 doi:10.1093/bioinformatics/bty734 (2019).
- 768 76 Shannon, P. *et al.* Cytoscape: a software environment for integrated models of  
769 biomolecular interaction networks. *Genome Res* **13**, 2498-2504, doi:10.1101/gr.1239303  
770 (2003).
- 771 77 Letunic, I. & Bork, P. Interactive Tree Of Life (iTOL) v4: recent updates and new  
772 developments. *Nucleic Acids Res* **47**, W256-W259, doi:10.1093/nar/gkz239 (2019).
- 773 78 Pasolli, E. *et al.* Accessible, curated metagenomic data through ExperimentHub. *Nat*  
774 *Methods* **14**, 1023-1024, doi:10.1038/nmeth.4468 (2017).

775

776

777

778

779

780



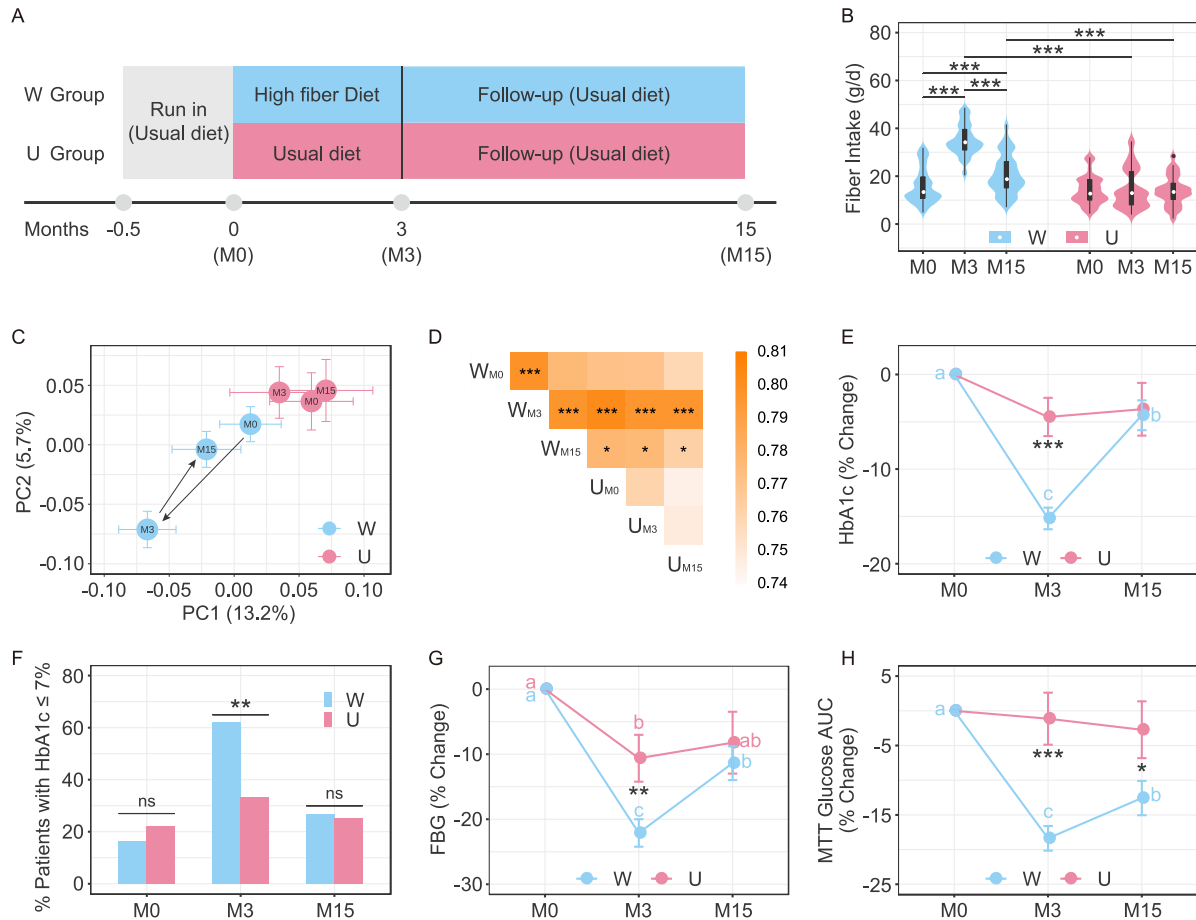

781

782

783

784 **Fig.1 Reversible changes of gut microbiota associates with reversible shifts of metabolic phenotypes in patients**

785 **with T2DM.** (A) Study design. Before Run-in, written informed consent, questionnaire of personal information and

786 measuring HbA1c at screening. After Run-in, medical checkup and sample collection at baseline (M0), three months

787 after on the high fiber intervention or usual diet (M3) and one year after the high fiber intervention stopped (M15).

788 (B) Changes of fiber intake. (C) Global changes of the gut microbiome as shown by the principal coordinate analysis

789 based on the Bray-Curtis distance for the 1845 genomes and (D) Average Bray-Curtis distance between the groups.

790 PERMANOVA test (9,999 permutations) was performed to compare the groups. \* P < 0.05 and \*\*\* P < 0.001. The

791 color of the square showed the magnitude of average Bray-Curtis distance. (E) Change of HbA1c, (F) The percentage

792 of participants with adequate glycemic control, (G) Fasting blood glucose, and (H) The glucose area under the curve

793 (AUC) in a meal tolerance test (MTT). For (E), (G) and (H), data shown as percent changes from baseline (± S.E.M).

794 Friedman test followed by Nemenyi post-hoc test was used for comparison in the same group, compact letters reflect

795 significance (P < 0.05). n = 67 in W group and n = 28 in U group. Mann-Whitney test (two-sided) was used for

796 comparison between W and U at the same time point, \* P < 0.05, \*\* P < 0.01 and \*\*\* P < 0.001. n = 74 in W (M0)

797 (For panel H, n=72), n = 74 in W (M3), n = 67 in W (M15), n = 36 in U (M0), n = 36 in U (M3) and n = 28 in U (M15).

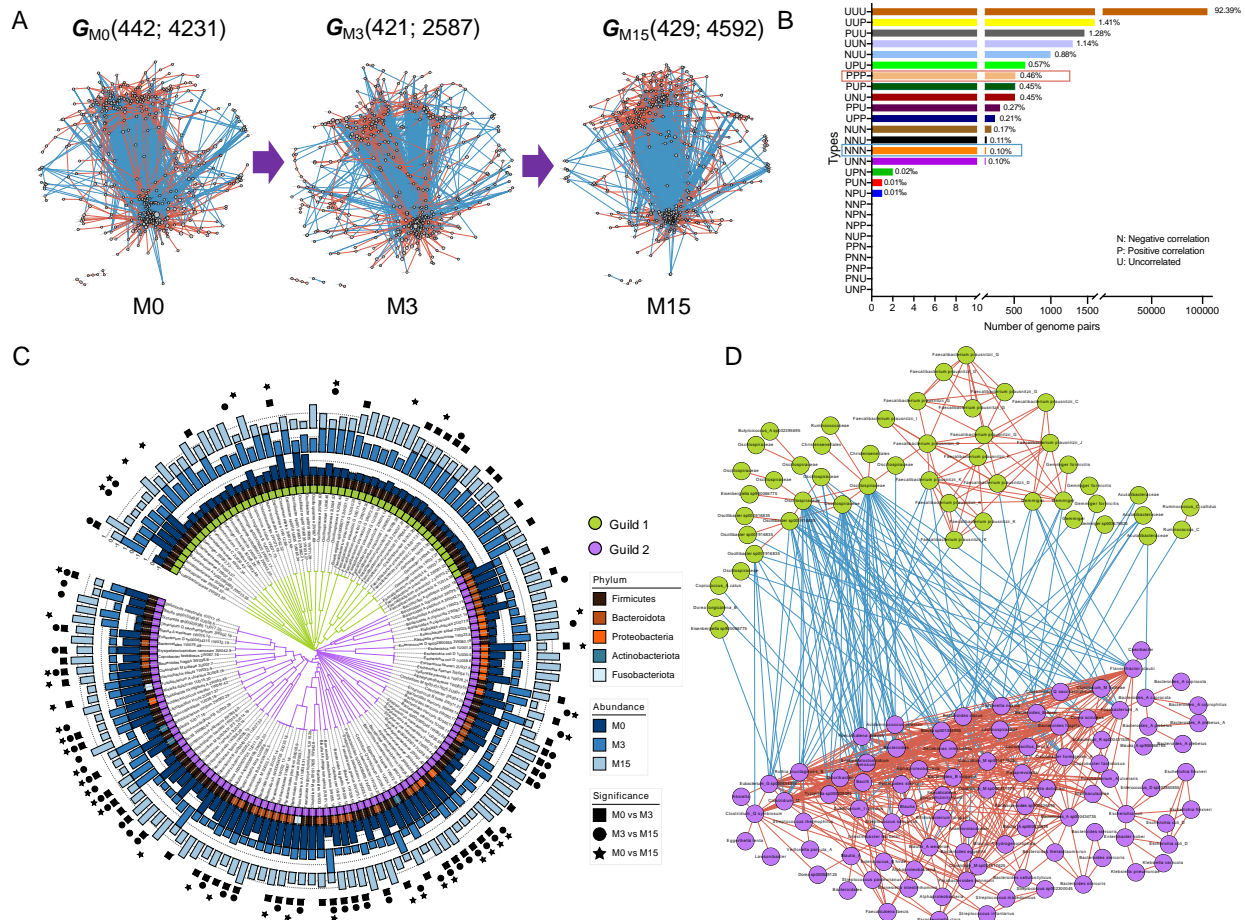

798  
 799 **Fig. 2. Two competing guilds of bacteria constitute a robust seesaw-like network despite the profound global**  
 800 **changes in the gut microbial ecosystem induced by introduction and withdrawal of the high fiber intervention.** (A)  
 801 Co-abundance networks of the prevalent genomes in W group at M0, M3 and M15 during the trial, denoted as  
 802  $G_{M0}(442; 4231)$ ,  $G_{M3}(421; 2587)$  and  $G_{M15}(429; 4592)$ , numbers in parenthesis are order and size of the network. The  
 803 correlations between genomes were calculated using FastSpar,  $n = 67$  patients. All significant correlations with  $P \leq$   
 804  $0.001$  were included. Edges between nodes represent correlations. Red and blue colors indicate positive and  
 805 negative correlations, respectively. Node size indicates the average abundance of the genomes. The layout of the  
 806 nodes and edges was determined by Edge-weighted Spring Embedded Layout with correlation efficient as weight.  
 807 (B) The distribution of different types of correlations of the genome pairs during the trial. The 3 letters show the  
 808 correlations of the genome pairs at M0, M3 and M15 subsequently. Stable correlations, NNN and PPP, were  
 809 highlighted (C) Average clustering of the 141 nodes based on their robust positive and negative correlations showed  
 810 two clusters (green and purple range). The bar plots show the abundance changes of each node throughout the trial,  
 811 which is expressed as median abundance with Z-score transformation. The differences of each node over time  
 812 were tested using the Friedman test followed by Nemenyi post-hoc test.  $P < 0.05$  was considered as significant. This panel  
 813 was plotted using iTOL. (D) The seesaw-like network with the 141 nodes in two polarizing clusters. Edges between  
 814 nodes represent correlations. Red and blue colors indicate positive and negative correlations, respectively. For (C)  
 815 and (D), the color of the node represents the members in the two guilds: green for Guild 1 and purple for Guild 2.

816  
 817  
 818  
 819



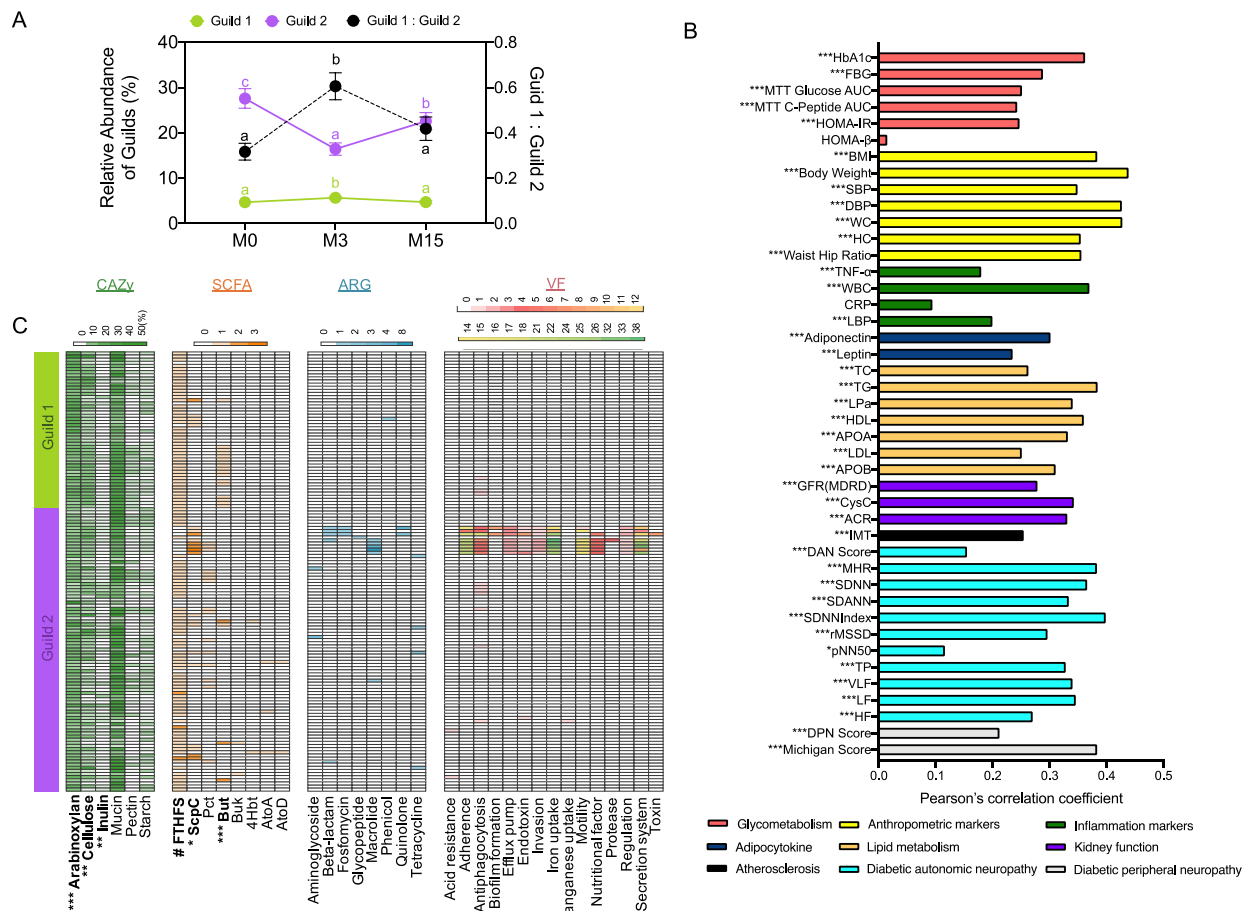

820  
 821 **Fig. 3. The balance between the two competing guilds in the seesaw-like network was associated with the**  
 822 **metabolic health of patients with type 2 diabetes.** (A) Change of the total abundance of Guild 1, Guild 2, and their  
 823 ratio across the trial in the W group. Friedman test followed by Nemenyi test was used to analyze the difference  
 824 between time points. Compact letters reflect the significance at  $P < 0.05$ . (B) Random Forest regression with leave-  
 825 one-out cross-validation was used to explore the associations between the 141 genomes and the clinical parameters.  
 826 The bar plot shows the Pearson's correlations coefficient between the predicted and measured values. The asterisk  
 827 before the parameter's name shows the significance of the Pearson's correlations. P values were adjusted by  
 828 Benjamini & Hochberg's method. \* adjusted  $P < 0.05$ , \*\* adjusted  $P < 0.01$  and adjusted \*\*\*  $P < 0.001$ . BMI, body  
 829 mass index; SBP, systolic blood pressure; DBP, diastolic blood pressure; WC, waist circumference; HP, hip  
 830 circumference; TNF- $\alpha$ , tumor necrosis factor- $\alpha$ ; WBC, white blood cell count; CRP, C-reactive protein; LBP,  
 831 lipopolysaccharide-binding protein; TC, total cholesterol; TG, triglyceride; Lpa, lipoprotein a; HDL, high-density  
 832 lipoprotein; APOA, apolipoprotein A; LDL, low-density lipoprotein; APOB, apolipoprotein B; GFR (MDRR), glomerular  
 833 filtration rate; CysC, Cystatin C; ACR, urinary microalbumin to creatinine ratio; IMT, intima-media thickness; DAN,  
 834 diabetic autonomic neuropathy score; MHR, mean heart rate; SDNN, standard deviation of NN intervals; SDANN,  
 835 standard deviation of the average NN intervals calculated over 5 minutes; SDNNIndex, mean of standard deviation  
 836 of NN intervals for 5-minute segments; rMSSD, root-mean-square of the differences of successive NN intervals;  
 837 pNN50, percentage of the interval differences of successive NN intervals greater than 50 ms; TP, total power; VLF,  
 838 very low frequency power; LF, low frequency power; HF, high frequency power; DPN, diabetic peripheral neuropathy  
 839 score. (C) Differences in genetic capacity of carbohydrate substrate utilization (CAZy), short-chain fatty acid  
 840 production (SCFA), number of antibiotic resistance genes (ARG) and number of virulence factor genes (VF). (C) The  
 841 heatmaps show the proportion (CAZy) or gene copy numbers (SCFA, ARG and VF) of each category in each genome.  
 842 For carbohydrate substrate utilization, CAZy genes were predicted in each genome. The proportion of CAZy genes  
 843 for a particular substrate was calculated as the number of the CAZy genes involved in its utilization divided by the  
 844 total number of the CAZy genes. Arabinoxylan-related CAZy families: CE1, CE2, CE4, CE6, CE7, GH10, GH11, GH115,

845 GH43, GH51, GH67, GH3 and GH5; cellulose-related: GH1, GH44, GH48, GH8, GH9, GH3 and GH5; inulin-related:  
846 GH32 and GH91; mucin-related families: GH1, GH2, GH3, GH4, GH18, GH19, GH20, GH29, GH33, GH38, GH58, GH79,  
847 GH84, GH85, GH88, GH89, GH92, GH95, GH98, GH99, GH101, GH105, GH109, GH110, GH113, PL6, PL8, PL12, PL13  
848 and PL21; pectin-related: CE12, CE8, GH28, PL1 and PL9; starch-related: GH13, GH31 and GH97. For short chain fatty  
849 acid production, FTHFS: formate-tetrahydrofolate ligase for acetate production; ScpC: propionyl-CoA succinate-CoA  
850 transferase and Pct: propionate-CoA transferase for propionate production; But: Butyryl-coenzyme A (butyryl-CoA):  
851 acetate CoA transferase, Buk: butyrate kinase, 4Hbt: butyryl- CoA: 4-hydroxybutyrate CoA transferase, Ato: butyryl-  
852 CoA:acetoacetate CoA transferase (AtoA: alpha subunit, AtoD: beta subunit) for butyrate production. Mann-Whitney  
853 test (two-sided) was used to analyze the difference between Guild 1 and Guild 2. # P < 0.1, \* P < 0.05, \*\* P < 0.01  
854 and \*\*\* P < 0.001. Guild 1 (green bar): n = 50, Guild 2 (purple bar): n = 91.

855  
856  
857  
858  
859  
860  
861  
862  
863  
864  
865  
866  
867  
868  
869

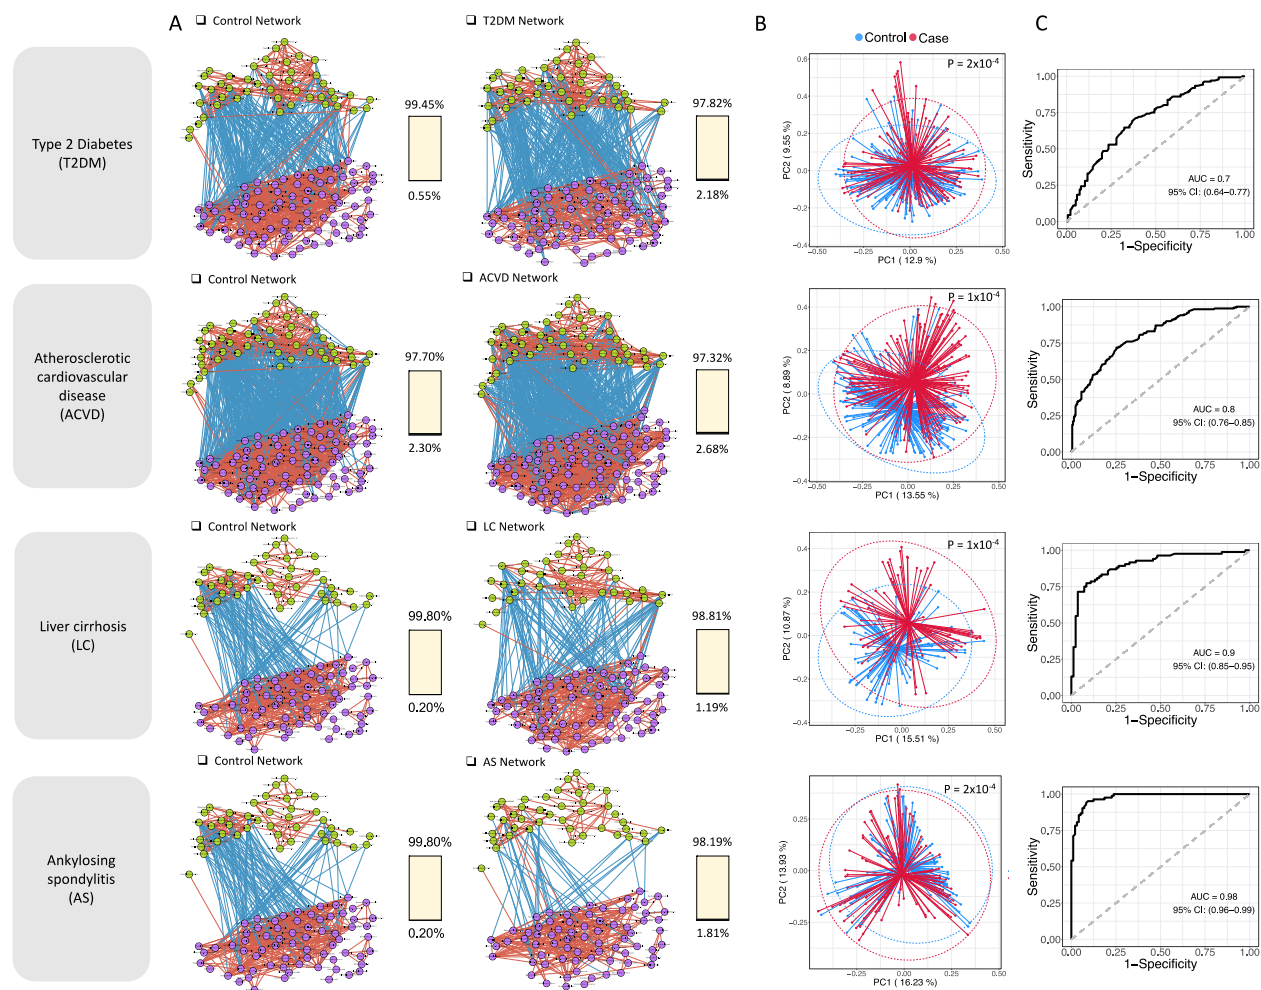

870  
871  
872  
873  
874  
875  
876  
877  
878  
879  
880  
881  
882  
883  
884  
885  
886  
887  
888  
889  
890  
891

**Fig.4. The seesaw networked microbiome signature exists in other independent human cohorts and supports classification models for different diseases.** (A) Members of the two competing Guilds in the seesaw networked microbiome signature showed similar ecological interactions in four independent human gut metagenomic datasets. The correlations between the genomes were calculated using FastSpar. All significant correlations ( $P \leq 0.001$ ) belonged to seesaw-like network (positive correlations within Guilds and negative correlations between Guilds) were included. Lines between nodes represent correlations, and red and blue colors indicate positive and negative correlations, respectively. The color of the node represents the members in the two competing guilds: green for Guild 1 and purple for Guild 2. The percentage of correlations followed the pattern in the seesaw networked microbiome signature (i.e., positive edges within each guild, negative edges between the 2 guilds) was in yellow, and the ratio of correlations that were negative within each guild and positive between the guilds was in black of the 100% stacked bar. (B) The composition of the c microbiome signature was different between control and patients in each dataset as shown in the Principal Coordinates Analysis plot based on Bray-Curtis distance. 95% confidence ellipses were projected for control and patients respectively. The p values of the PERMANOVA test were indicated. (C) The microbiome signature supports classification models for the four different diseases. The area under the ROC curve (AUC) of the Random Forest classifier based on the 141 genomes in the microbiome signature to classify control and patients in each dataset. Leave-one-out cross validation was applied. Type 2 diabetes (T2DM): Control n = 136, T2D n=136; Atherosclerotic cardiovascular disease (ACVD): Control n = 171 and ACVD n = 214; Liver cirrhosis (LC): control n = 83 and LC n =84; Ankylosing spondylitis: Control n = 83 and AS n = 97.
